# Supplementary figures and images for: Rise of the BQ.1.1.37 SARS-CoV-2 Sublineage, Italy
Source: MDPI journal article supplement (doi:10.3390/diagnostics13051000), 2023-03-06

Tree scale: 0.0001

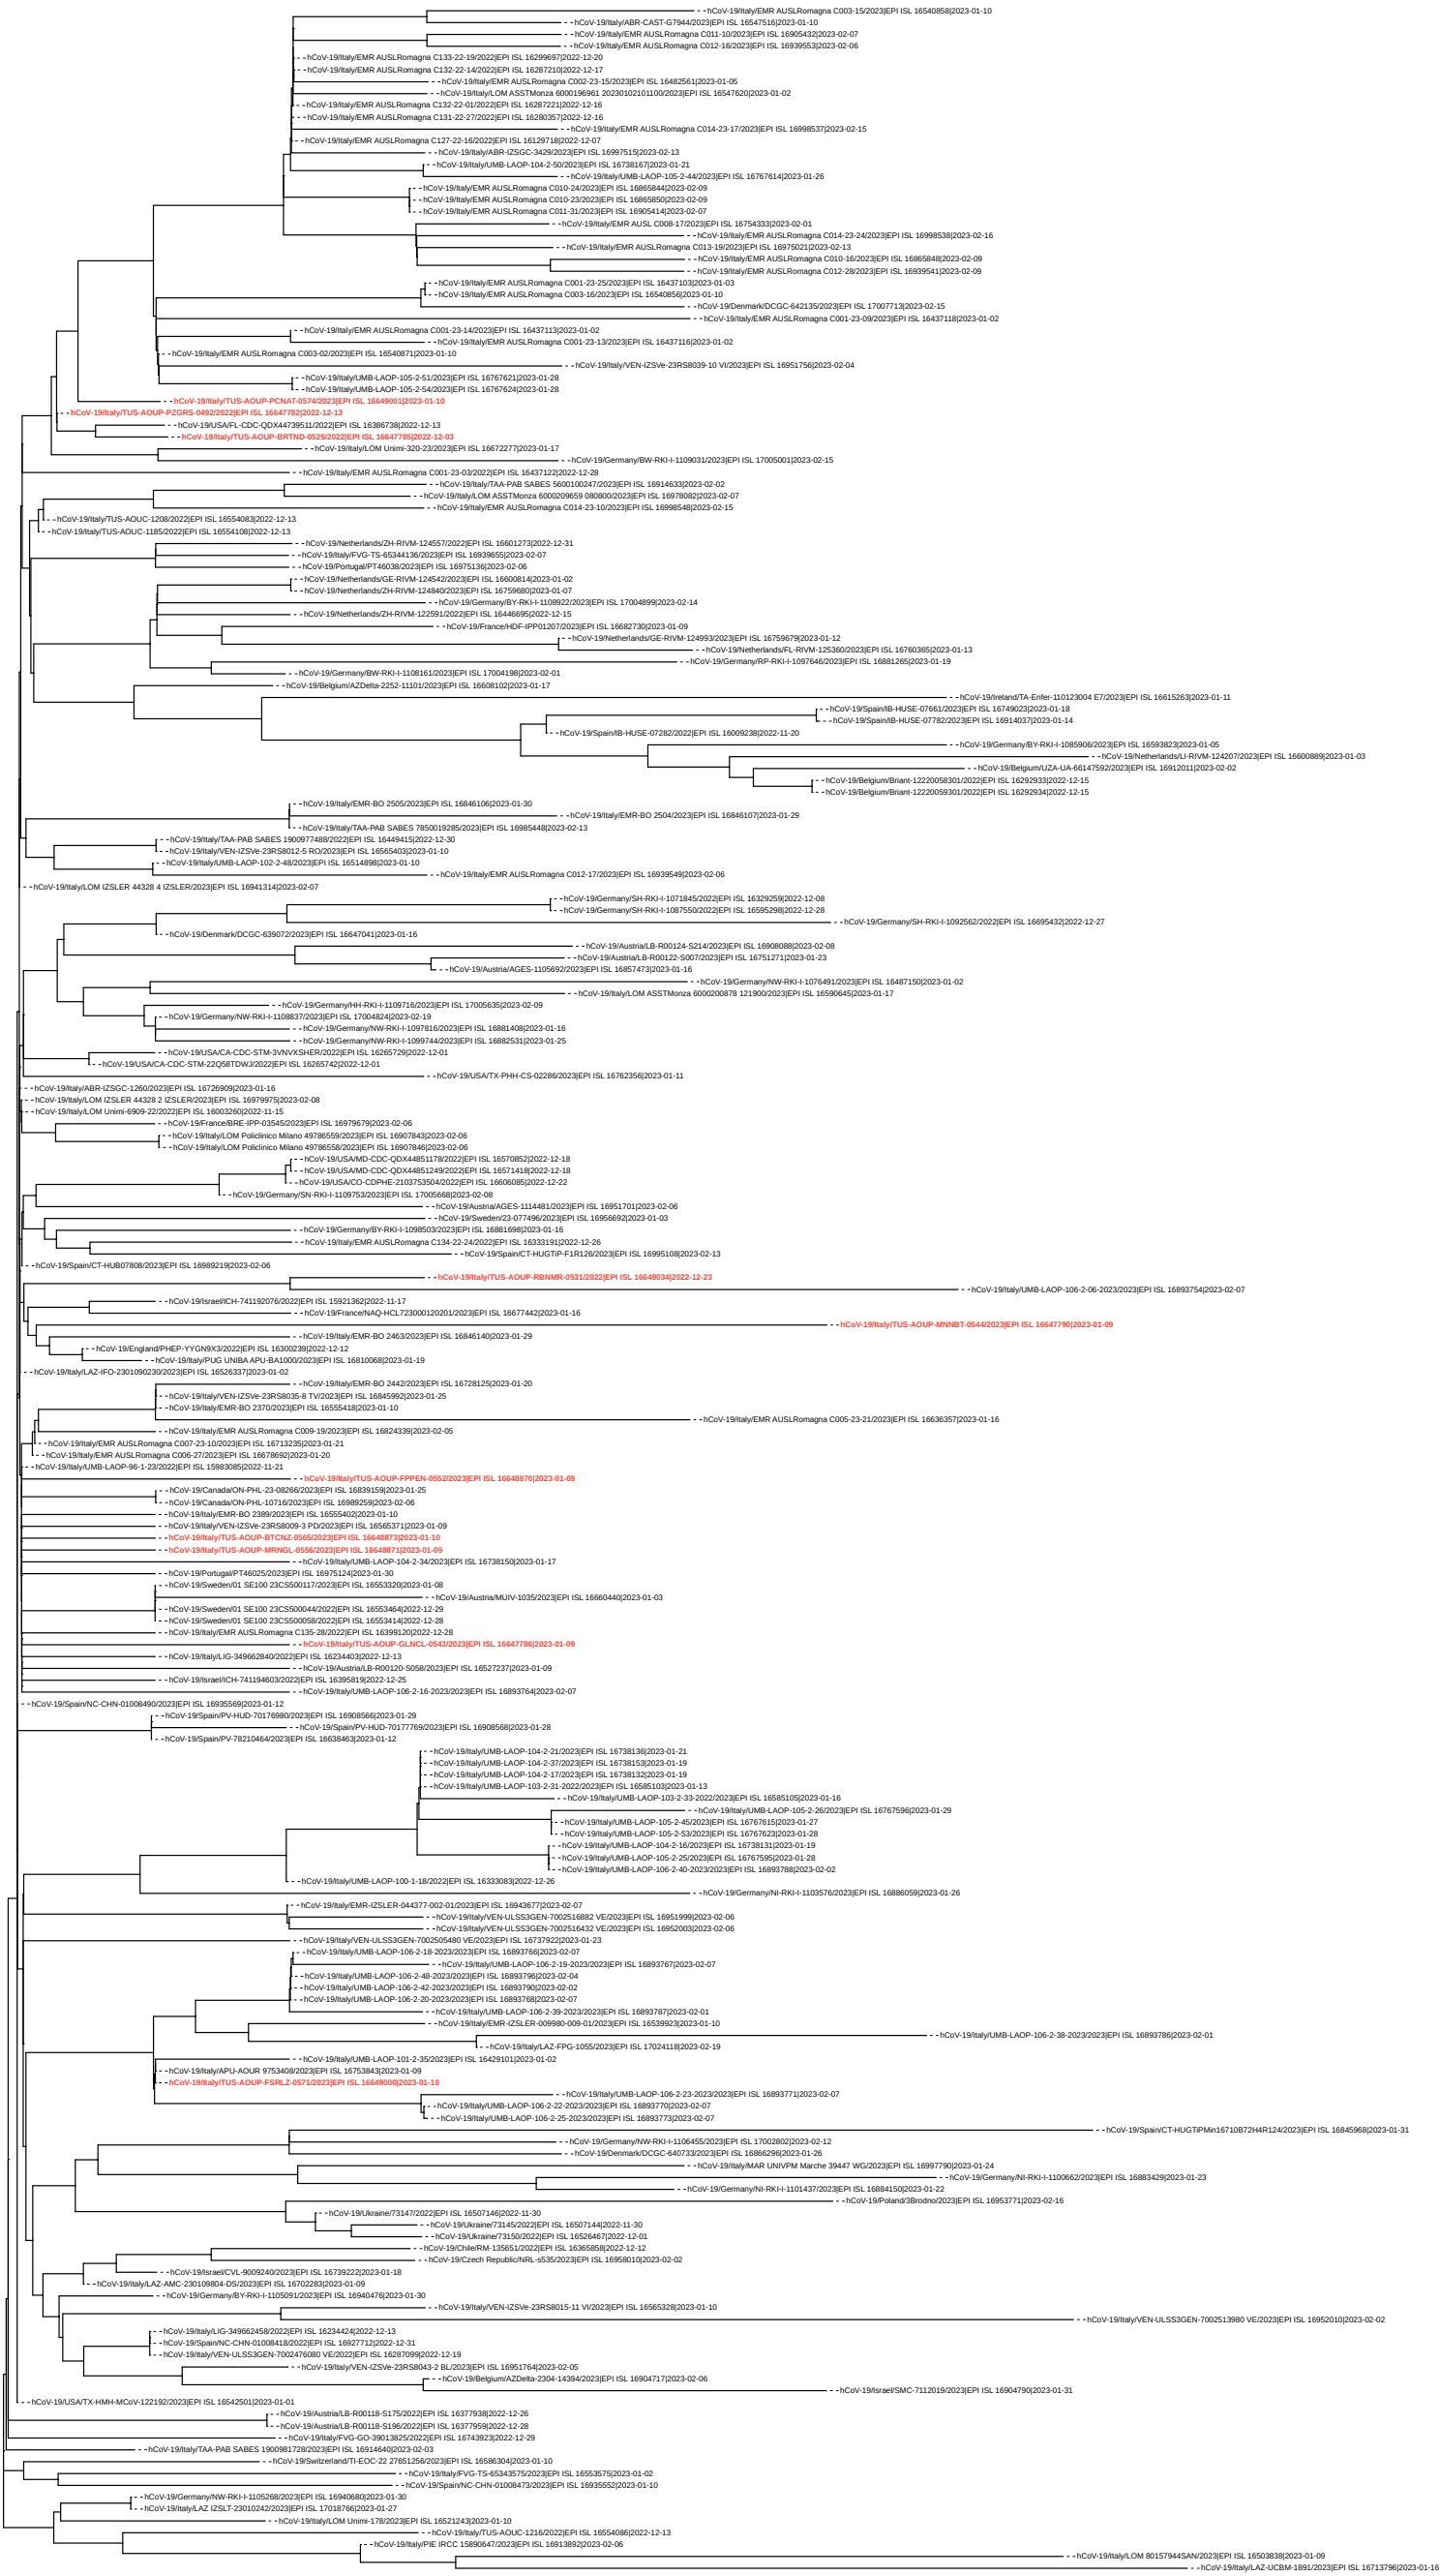

Supplement: s1 [file s1]
